# Supplementary material
Source: publisher site journal article supplement (https://www.dovepress.com/get_supplementary_file.php?f=276687.docx)
Supplement: Supplementary file 1 [file get_supplementary_file.php]

Appendix 1: PGx Genes and Alleles Tested in the Study

| **Gene** | **Alleles** |
| --- | --- |
| ***CYP2C19*** | *2, *3, *4, *4B, *5, *6, *7, *8, *9, *17 |
| ***CYP2C9*** | *2, *3, *4, *5, *6, *11 |
| ***CYP2D6*** | *2, *3, *4, *4M, *5, *6, *7, *8, *9, *10  *12, *14A, *14B, *17, *29, *35, *41, XN |
| ***CYP3A4*** | *1B, *2, *3, *12, *17, *22 |
| ***CYP3A5*** | *1D, *2, *3, *3B, *3C, *6, *7, *8, *9 |
| ***MTHFR*** | 1298A>C |
| ***MTHFR*** | 677C>T |
| ***SLCO1B1*** | 521T>C, 388A>G |
| ***VKORC1*** | -1639G>A |
| ***CYP1A2*** | *1C, *1D, *1F, *1K, *1L, *1V, *1W |
| ***CYP2B6*** | *6 , *9 |
| ***OPRM1*** | A118G |
| ***COMT*** | Val158Met |
| ***ANKK1/DRD2*** | DRD2:Taq1A |
| ***HTR2A*** | -1438G>A, 102C>T |
| ***HTR2C*** | -759C>T |
